# Supplementary material for: Effect of Polycan, a β-Glucan from Aureobasidium pullulans SM-2001, on Inflammatory Response and Intestinal Barrier Function in DSS-Induced Ulcerative Colitis
Source: MDPI journal article supplement (doi:10.3390/ijms241914773), 2023-09-30
Supplement: s1 [file s1]

Supplement data Table S1. Specific primer sequences for PCR

| Mouse gene | Forward primer sequence (5'-3')       | Reverse Primer Sequence (5'-3')         |
|------------|---------------------------------------|-----------------------------------------|
| IL-1β      | 5'-CAGGATGAGGACATGAGC-3'              | 5'-CTCTGCAGACTCAAACCTCCA-3'             |
| TNF-α      | 5'-TCTGTCTACTGAACTTCGGGGTGATCGGTCC-3' | 5'-GTATGAGATAGCAAATCGGCTGACGGTGTGGG-3'  |
| IL-6       | 5'-TCCAGTTGCCTTCTTGGGAC-3'            | 5'-GTGTAATTAAGCCTCCGACTTG-3'            |
| Caspase-3  | 5'-GGC TTG CCA GAA GAT ACC GGT-3'     | 5'-GCA TAA ATT CTA GCT TGT GCG CGT A-3' |
| PARP       | 5'-CCAGCGCAGCTCAGAGAAGCCA-3'          | 5'-CATGTTCGATGGGAAAGTCCC-3'             |
| Bax        | 5'-CTACAGGGTTTCATCCAG -3'             | 5'-CCAGTTCATCTCCAATTCG-3'               |
| Bcl-2      | 5'-GTGGATGACTGAGTACCT -3'             | 5'-CCAGGAGAAATCAAACAGAG-3'              |
| F4/80      | 5'-TTTCCTCGCCTGCTTCTTC-3'             | 5'-CCCCGTCTCTGTATTCAACC-3'              |
| Zo-1       | 5'-AGGACACCAAAGCATGTGAG-3'            | 5'-GGCATTCTGCTGGTTACA-3'                |
| GAPDH      | 5'-AACGACCCCTTCATTGAC-3'              | 5'-TCCACGACATACTCAGCAC-3'               |

Supplement data Table S2. Intestinal microbiota distribution at phylum level

| Phylum          | CTL    | DSS    | DSS+<br>5-ASA | DSS+<br>Polycan 250 | DSS+<br>Polycan 500 |
|-----------------|--------|--------|---------------|---------------------|---------------------|
| Bacteroidetes   | 63.36% | 43.87% | 60.82%        | 60.25%              | 41.80%              |
| Firmicutes      | 34.99% | 40.44% | 26.06%        | 22.90%              | 19.37%              |
| Proteobacteria  | 0.85%  | 11.89% | 9.21%         | 10.84%              | 34.45%              |
| Deferribacteres | 0.34%  | 1.92%  | 1.99%         | 4.06%               | 1.58%               |
| Actinobacteria  | 0.30%  | 0.12%  | 0.09%         | 0.75%               | 2.65%               |
| Verrucomicrobia | 0.00%  | 0.28%  | 0.01%         | 0.01%               | 0.00%               |
| Lentisphaerae   | 0.00%  | 0.00%  | 0.00%         | 0.00%               | 0.00%               |
| Tenericutes     | 0.00%  | 0.12%  | 0.00%         | 0.03%               | 0.00%               |
| _Unclassified   | 0.17%  | 1.36%  | 1.82%         | 1.17%               | 0.14%               |
